# Supplementary material for: VE1 immunohistochemistry predicts BRAF V600E mutation status and clinical outcome in colorectal cancer
Source: PubMed Central journal article supplement (PMC4747166; doi:10.18632/oncotarget.6162), 2015-10-19
Supplement: oncotarget-06-41453-s001.pdf [file oncotarget-06-41453-s001.pdf]

## VE1 immunohistochemistry predicts BRAF V600E mutation status and clinical outcome in colorectal cancer

### Supplementary Material

#### Supplemental Table 1:

VE1 scores for colorectal cancers given by each of the three observers and concordance with BRAFV600E status detected by mutation analysis

| Observer 1 |        |           |                     |
|------------|--------|-----------|---------------------|
| VE1 IHC    | Mutant | Wild-type | Not-evaluable cases |
| +          | 17     | 1         | 2                   |
| -          | 0      | 13        |                     |
| Observer 2 |        |           |                     |
| VE1 IHC    | Mutant | Wild-type | Not-evaluable cases |
| +          | 18     | 1         | 0                   |
| -          | 0      | 14        |                     |
| Observer 3 |        |           |                     |
| VE1 IHC    | Mutant | Wild-type | Not-evaluable cases |
| +          | 18     | 1         | 0                   |
| -          | 0      | 14        |                     |

**Supplemental Table 2:****Characteristics of prognostic cohorts (Cohorts 1 and 2)**

| Feature              |                   | <b>Cohort 1<br/>(n=259)</b> | <b>Cohort 2A<br/>(n=226)</b> | <b>Cohort 2B<br/>(n=118)</b> |
|----------------------|-------------------|-----------------------------|------------------------------|------------------------------|
| Age (years)          | Median (min, max) | 66 (25-91)                  | 71.5 (19-91)                 | 72.9 (30-91)                 |
|                      |                   |                             |                              |                              |
| Gender               | Male              | 139 (53.7)                  | 146 (60.1)                   | 72 (61.0)                    |
|                      | Female            | 120 (46.3)                  | 97 (39.9)                    | 46 (39.0)                    |
|                      |                   |                             |                              |                              |
| Histological subtype | Adenocarcinoma    | N.A                         | 204 (83.3)                   | 100 (48.8)                   |
|                      | Mucinous          | N.A                         | 41 (16.7)                    | 18 (15.3)                    |
|                      | Other             | N.A                         | -                            | -                            |
|                      |                   |                             |                              |                              |
| Tumor location       | Left              | 219 (84.6)                  | 107 (44.2)                   | 50 (43.1)                    |
|                      | Rectum            | 0 (0.0)                     | 48 (19.8)                    | 25 (21.6)                    |
|                      | Right             | 40 (15.4)                   | 87 (36.0)                    | 41 (35.3)                    |
|                      |                   |                             |                              |                              |
| pT                   | pT1-2             | 53 (20.5)                   | 42 (17.1)                    | 27 (22.9)                    |
|                      | pT3-4             | 206 (79.5)                  | 203 (82.9)                   | 91 (77.1)                    |
|                      |                   |                             |                              |                              |
| pN                   | pN0               | 154 (59.7)                  | 100 (40.8)                   | 49 (41.5)                    |
|                      | pN1-2             | 104 (40.3)                  | 145 (59.2)                   | 69 (56.5)                    |
|                      |                   |                             |                              |                              |
| pM                   | pM0               | 224 (86.8)                  | 215 (87.8)                   | 103 (87.3)                   |
|                      | pM1               | 34 (13.2)                   | 30 (12.2)                    | 15 (12.7)                    |
|                      |                   |                             |                              |                              |
| Tumor Grade          | G1-2              | 233 (90.0)                  | 174 (71.9)                   | 81 (69.8)                    |
|                      | G3-4              | 26 (10.0)                   | 68 (28.1)                    | 35 (30.2)                    |
|                      |                   |                             |                              |                              |
| Lymphatic invasion   | Absent            | N.A                         | 43 (25.6)                    | 28 (26.4)                    |

|                        |                     |              |                |                 |
|------------------------|---------------------|--------------|----------------|-----------------|
|                        | Present             | N.A          | 125 (74.4)     | 78 (73.6)       |
|                        |                     |              |                |                 |
| Venous invasion        | Absent              | N.A          | 73 (42.0)      | 53 (49.5)       |
|                        | Present             | N.A          | 101 (58.0)     | 54 (51.5)       |
|                        |                     |              |                |                 |
| Perineural invasion    | Absent              | N.A          | 120 (85.1)     | 93 (88.6)       |
|                        | Present             | N.A          | 21 (14.9)      | 12 (11.4)       |
|                        |                     |              |                |                 |
| Peritumoral budding    | Mean (min-max)      | N.A          | 6.5 (0-85)     | 6.65 (0-28)     |
|                        |                     |              |                |                 |
| Intratumoral budding   | Mean (min-max)      | N.A          | 4.9 (0.1-43.3) | 4.55 (0.2-37.1) |
|                        |                     |              |                |                 |
| Post-operative therapy | None                | 157 (55.0)   | 177 (73.4)     | 94 (84.1)       |
|                        | Treated             | 87 (35.7)    | 64 (26.6)      | 23 (19.7)       |
|                        |                     |              |                |                 |
| MLH1 expression        | Deficient           | 26 (10.0)    | 23 (11.2)      | 14 (13.1)       |
|                        | Proficient          | 233 (90.0)   | 182 (88.8)     | 93 (86.9)       |
|                        |                     |              |                |                 |
| Survival               | 5-year survival (%) | 66.4 (60-72) | 58.1 (49-65)   | 59.0 (48-68)    |

### Supplemental Table 3

#### Characteristics of Cohort 3 (matched primary and metastatic lesions)

| <b>Patients:</b>                                                                                                                                                                                      | <b>1</b> | <b>2</b> | <b>3</b> | <b>4</b> | <b>5</b> | <b>6</b> | <b>7</b> | <b>8</b> | <b>9</b> | <b>10</b>  | <b>11</b> | <b>12</b> | <b>13</b> |
|-------------------------------------------------------------------------------------------------------------------------------------------------------------------------------------------------------|----------|----------|----------|----------|----------|----------|----------|----------|----------|------------|-----------|-----------|-----------|
| Age                                                                                                                                                                                                   | 58       | 85       | 60       | 72       | 66       | 55       | 50       | 56       | 66       | 42         | 67        | 63        | 64        |
| Gender                                                                                                                                                                                                | 1        | 1        | 0        | 0        | 1        | 0        | 1        | 0        | 0        | 0          | 0         | 1         | 0         |
| Histology                                                                                                                                                                                             | Adeno    | Adeno    | Adeno    | Adeno    | Adeno    | Adeno    | Adeno    | Adeno    | Adeno    | Adeno      | Adeno     | Adeno     | Adeno     |
| Location                                                                                                                                                                                              | Rectum   | Right    | Right    | Right    | Right    | Right    | Left     | Right    | Left     | Left       | Right     | Left      | Right     |
| pT                                                                                                                                                                                                    | 4        | 4        | 3        | 4        | 2        | 3        | 4        | 4        | 4        | 4          | 4         | 4         | 3         |
| pN                                                                                                                                                                                                    | 2        | 2        | 2        | 1        | 2        | 1        | 1        | 2        | 2        | 1          | 1         | 1         | 1         |
| pM                                                                                                                                                                                                    | 1        | 1        | 1        | 1        | 1        | 1        | 1        | 1        | 1        | 1          | 1         | 1         | 1         |
| Grade                                                                                                                                                                                                 |          | 3        | 2        | 2        | 2        | 2        | 2        | 3        | 2        | 2          | 2         | 2         | 2         |
| L                                                                                                                                                                                                     | 1        | 1        | 1        | 1        | 1        | 1        | 1        | 1        | 1        | 1          | 1         | 1         | 1         |
| V                                                                                                                                                                                                     | 1        | 1        | 1        | 1        | 1        | 1        | 1        | 1        | 1        | 1          | 1         | 1         | 1         |
| Therapy                                                                                                                                                                                               | 1        | 1        | 1        | 1        | 1        | 1        | 1        | 1        | 1        | 1          | 1         | 1         | 1         |
| Metastasis location                                                                                                                                                                                   | Liver    | Omentum  | Liver    | Liver    | Liver    | Liver    | Ovary    | Liver    | Liver    | Peritoneum | Liver     | Liver     | Liver     |
| No. primary tumor regions analyzed*                                                                                                                                                                   | 6        | 8        | 2        | 7        | 3        | 5        | 12       | 6        | 4        | 11         | 4         | 5         | 11        |
| No. metastasis tumor regions analyzed*                                                                                                                                                                | 8        | 1        | 2        | 4        | 2        | 5        | 1        | 1        | 1        | 4          | 4         | 3         | 3         |
| *13 metastatic patients, 100 tumor blocks in total were analyzed and in some cases more than 1 region per tumor block was included. The total number of tumor regions investigated for VE1 was n=123. |          |          |          |          |          |          |          |          |          |            |           |           |           |

**Supplemental Table 4:****Tissue microarray and additional patient characteristics for the various cohorts**

|                                           | <b>Pilot cohort</b> | <b>Cohort 1</b> | <b>Cohort 2A</b> | <b>Cohort 2B</b>    | <b>Matched primary and metastasis</b>    |
|-------------------------------------------|---------------------|-----------------|------------------|---------------------|------------------------------------------|
| Origin                                    | Switzerland         | Germany         | Switzerland      | Switzerland         | Switzerland                              |
| Number of evaluable patients for BRAF VE1 | 65                  | 259             | 226              | 118                 | 14                                       |
| ngTMA punch size                          | 1.0mm               | 0.6mm           | 0.6mm            | 1.0mm               | 0.6mm                                    |
| No. punches                               | 3/tumor             | 6/tumor         | 8/tumor          | 1/tumor             | 1-3/every block (primary and metastasis) |
| Patients included from                    | 2010-2014           | 1993-2005       | 2002-2011        | 2002-2011           | 2004-2013                                |
| Material                                  | Surgical            | Surgical        | Surgical         | Preoperative biopsy | Surgical                                 |

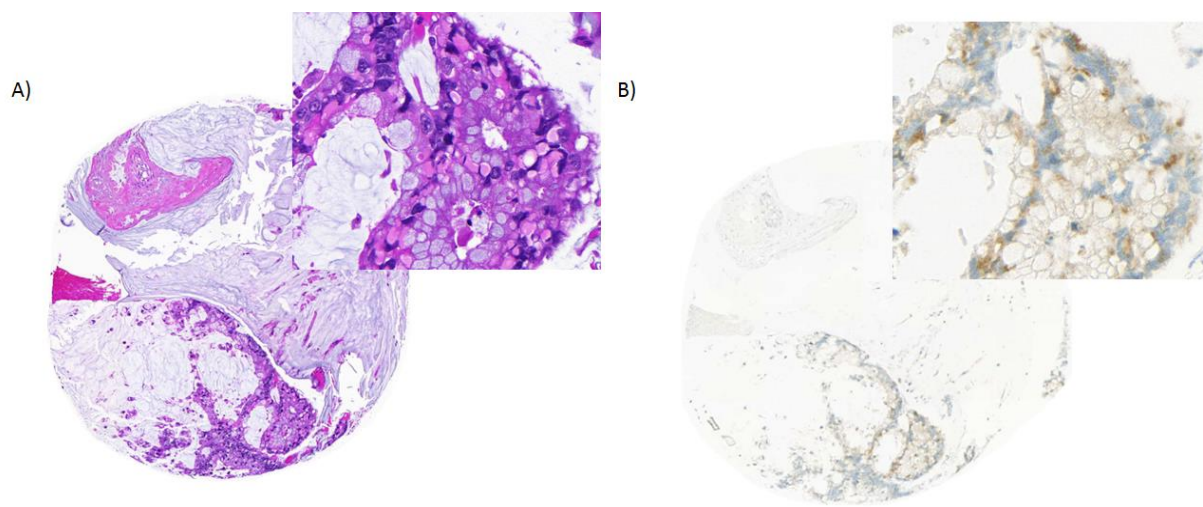

**Supp Figure 1: One colon cancer case was detected by all three observers as positive for VE1 whereas mutational status was confirmed as wild-type. Top row, 10x magnification, bottom row, 40x magnification. A and C: H&E staining, B and D: VE1 staining.**

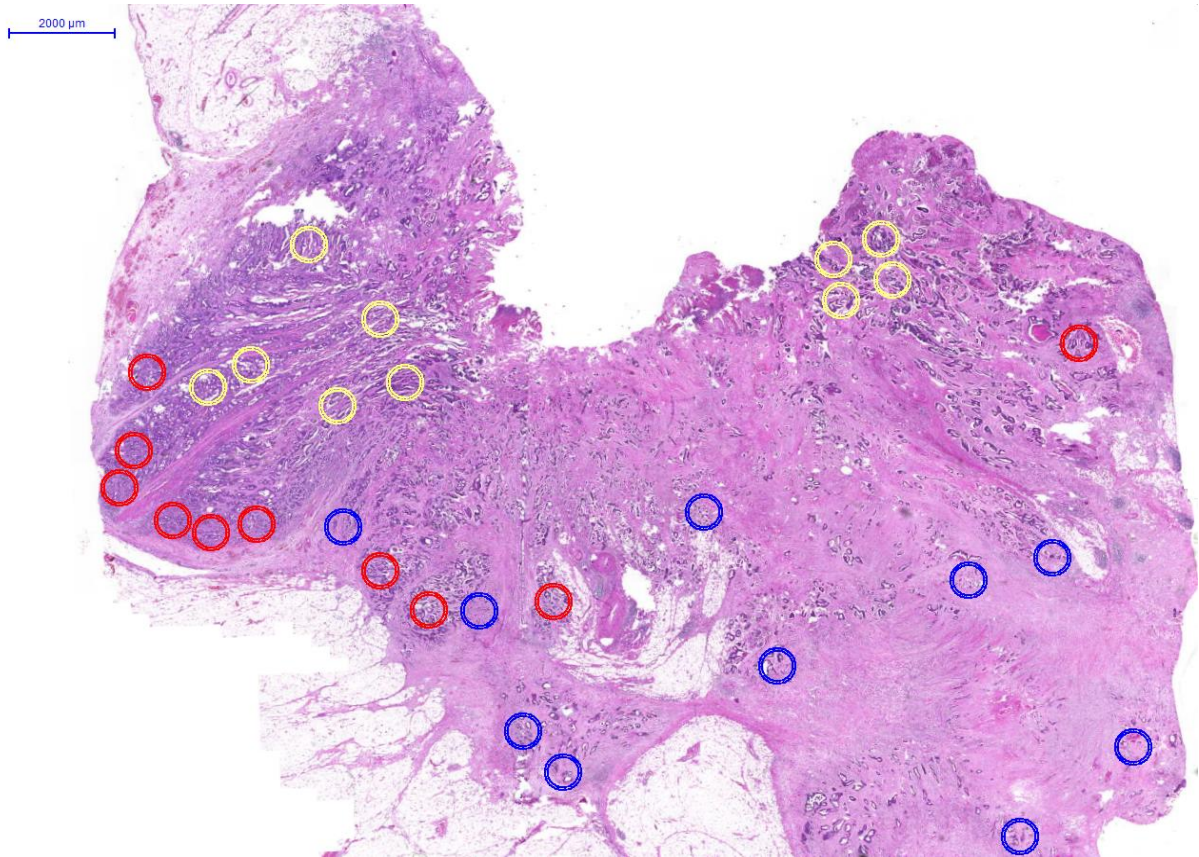

**Supp Figure 2:** An example of the next-generation tissue microarray construction. The hematoxylin and eosin stained colorectal cancer is scanned and uploaded to a digital platform. The slide is annotated using a tissue microarray tool with 0.6mm diameter cores in different colors. The digital slide will be aligned to the corresponding donor block in an automated tissue microarrayer and annotated regions will be captured and transferred into the final tissue microarray recipient block. Yellow: tumor center, red: tumor front, blue: tumor microenvironment. Normal tissues will be captured from a second donor block representing the resection margin.
